# Supplementary material
Source: PubMed Central journal article supplement (PMC2773064)

```

OsHYD1 : MATGLSGGAMTSFAVKNPILLAAAVRRRSWPPPSGRALPFSPLTRTPRSRG..LGTVTCFVPOGTESQQAPAPSPPTVPV
ZmHYD3 : .....MAAAMTSFVAKNPILLAAAARRR..APPLAGRALPFSPLASTRAPRR....TVTCTFVPODTAAPAPVPA.....
ZmHYD4 : MAAGLSGAMTSFVAKNPILLAAAARRRALPPLAGRALPFSPLTTARAPRRRGLGTVTCFVPODTEHPAAAAPAP..VAPV
OsHYD2 : .....MAVRLVVIITPAVLLGR TARVSPSAVP.....RLRPVAGRRRAV...AAPTRAVLGDGAGVGG.....
OsHYD3 : .....MAVRLVAARAPLLSPAAVAAHRSP.....ALLRLAFAPLPARRLAVPLRVAVGEP.....
ZmHYD5 : .....MAVRLVSAFFPLAPLRVRAPRALPPGAHAGP...RPPVLALAPPAASAAPRRRAVPARAAPEDG.....
ZmHYD6 : .....MAVRLVAAPFFLATCRLRRPRPALPP..AHAGGPRPOVLVLAPPAATAA..RRAVPLVRAAPEDEAVVAG.....

                                TMH1                                TMH2
OsHYD1 : PVPSEEEEEAAAAARRLAEKARKKLSERRTYLVAAVMSLGF TSMVA AVYYR FHWQLEGGD..VPMTEMFGT FALS VGA
ZmHYD3 : .....LDEEAAAAARRVAEKARKRSERRTYLVAAVMSLGV TSMVA AVYYR FSWQMEGGE..VPPVTEFLGT FALS VGA
ZmHYD4 : PETALDEEAAAAARRVAEKARKKRSERRTYLVAAVMSLGV TSMVA AVYYR FSWQMEGCA..VPPVSEMFGT FALS VGA
OsHYD2 : ...EEDAVVAVVEEDAVARRAARKRSERRTYLVAAVMSLGF TSMAAA AVYYR FAWQMEAGGGDVPATEMVGTFALS VGA
OsHYD3 : ...E...PEEDARRAVARRAARKRSERRTYLVAAVMSLGF TSMAAA AVYYR FAWQMEVGG.EIPVTEMFGT FALS VGA
ZmHYD5 : .....GRGDAAAARRAARKRSERRTYLVAAVMSLGF TSMAAA AVYYR FAWQMEGGG.AIPVTEMVGTFALS VGA
ZmHYD6 : ...D...GGGDAAEVAARRAARKRSERRTYLVAAVMSLGF TSMAAA AVYYR FAWQMEGGG.EIPVTEMVGTFALS VGA

                                TMH3                                TMH4
OsHYD1 : AVGMFWARWAHRALWHASLWHMHESHHRAR..EGPFELNDVFAITNAVPAISLLAYGFFHRGLVPGLCFGAGLGITLFGM
ZmHYD3 : AVGMFWARWAHRALWHASLWHMHESHHRPR..EGPFELNDVFAITVNAVPAISLLAYGFFHRGLVPGLCFGAGLGITLFGM
ZmHYD4 : AVGMFWARWAHRALWHASLWHMHESHHRPR..EGPFELNDVFAITVNAVPAISLLAYGFFHRGLVPGLCFGAGLGITLFGM
OsHYD2 : AVGMFWARWAHRALWHASLWHMHESHHRPR..DGPPELNDVFAITANA VPAISLLAYGLLNRLVPGLCFGAGLGITLFGM
OsHYD3 : AVGMFWARWAHRALWHASLWHMHESHHRPR..DGPPELNDVFAITNAV PAMSLLAYGFFTRGLVPGLCFGAGLGITLFGM
ZmHYD5 : AVGMFWARWAPRALWHASLWHMHESHHRARD DGPPELNDVFAITVNAV PAMSLLAYGFFNRGLVPGLCFGAGLGITLFGM
ZmHYD6 : AVGMFWARWAHRALWHASLWHMHESHHRPR..DGPPELNDVFAITVNAV PAMSLLAYGFFNRGLVPGLCFGAGLGITLFGM

                                HXXXXH HXXHH
OsHYD1 : AYMFVHDGLVHRRFPVGP IANVPYFRRVAAAHK IHHMDKFE GVPYGLFLGPKELLEVGCLEELKEKELARINRSL.....
ZmHYD3 : AYMFVHDGLVHRRFPVGP IADVYFRRVAAHSHLHHMDKFE GVPYGLFLGPKELLEVGCLEELVSSPVSEATDTE DAGEE
ZmHYD4 : AYMFVHDGLVHRRFPVGP IANVPYFRRVAAAHK IHHMDKFE GVPYGLFLGPKELLEVGCLEELKEKELARIGRTI.....
OsHYD2 : AYMFVHDGLVHRRFPVGP IENVPYFRRVAAAHQLHHTDKFE GVPYGLFLGPKELLEVGCLEELDKKRIKRKEAMDAI
OsHYD3 : AYMFVHDGLVHRRFPVGP IANVPYFRRVAAAHQLHHTDKFE GVPYGLFLGPKELLEVGCLEELKEKIKRIRKRKETLDAI
ZmHYD5 : AYMFVHDGLVHRRFPVGP IENVPYFRRVAAAHQLHMDKFE GVPYGLFLGPKELLEVGCLEELKEKIKRIRRRREALDAT
ZmHYD6 : AYMFVHDGLVHRRFPVGP IENVPYFRRVAAAHQLHMDKFE GVPYGLFLGPKELLEVGCLEELKEKIKRIRRRREALDAI

                                HXXXXH                                HXXHH
OsHYD1 : .....
ZmHYD3 : KTRPVCCVVRTSVFMGQSVNPF
ZmHYD4 : .....
OsHYD2 : R.....
OsHYD3 : Q.....
ZmHYD5 : Q.....
ZmHYD6 : Q.....

```

**Figure S1. Conserved motifs in HYD proteins of maize and rice.** Multiple sequence alignment of HYD protein sequences from maize (*Zm*; *Zea mays*) and rice (*Os*; *Oryza sativa*) indicates variable N-termini harboring the chloroplast transit peptide (light blue shaded box), four transmembrane helices (TMH1-4) and four histidine motifs necessary for enzymatic function (consensus sequences indicated by a thin overline).

## $\beta$ -carotene accumulating cells

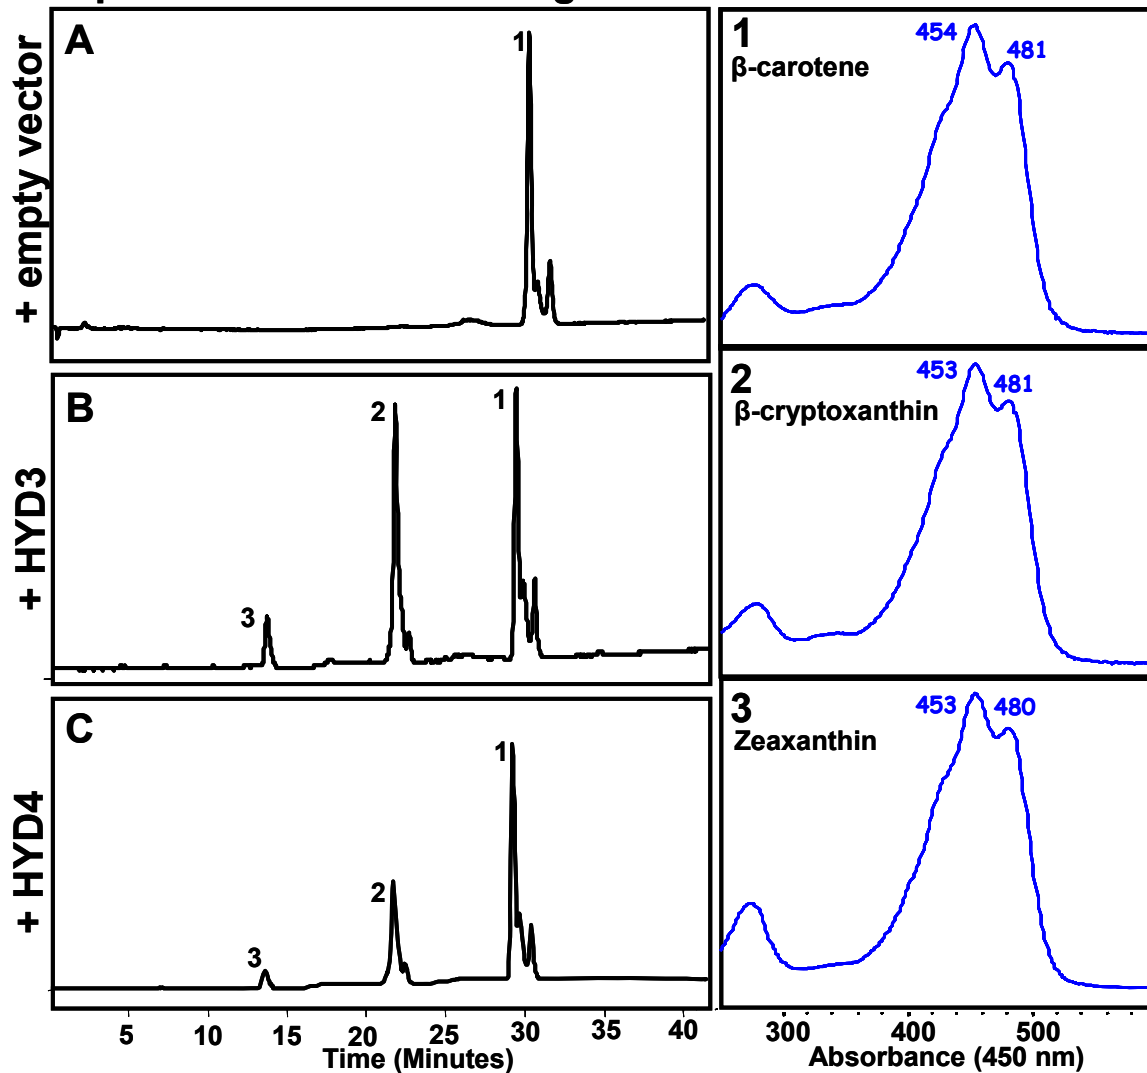

**Figure S2. Functional complementation of *HYD* genes.** Control cells carrying pAC-BETA-04 which contains genes encoding enzymes needed for  $\beta$ -carotene production (Sun et al., 1996) and an empty vector (pET23c) accumulated the  $\beta$ -carotene substrate (Fig. S2A). Alternatively, when  $\beta$ -carotene – accumulating cells were transformed with the *HYD3* (Fig. S2B) or *HYD4* (Fig. S2C) expression constructs, additional peaks were observed that corresponded to enzyme intermediate,  $\beta$ -cryptoxanthin, and enzyme product, zeaxanthin. This observed hydroxylase activity was similar to that seen for the other class of  $\beta$ -ring hydroxylase, the P450 CYP97A enzyme, which also hydroxylates  $\beta$ -rings, in contrast to CYP97C which was shown to hydroxylate  $\epsilon$ -rings (Quinlan et al., 2007). **Left**, HPLC chromatograms, at 450 nm of extracted pigments from *E. coli* transformed with pAC-BETA-04 and (A) pET23C (empty vector), showing accumulated  $\beta$ -carotene (peak 1); or (B) pTHYD3 encoding HYD3, showing  $\beta$ -carotene plus  $\beta$ -cryptoxanthin and zeaxanthin (peaks 1-3, respectively); or (C) pTHYD4 encoding HYD4, showing  $\beta$ -carotene plus  $\beta$ -cryptoxanthin and zeaxanthin (peaks 1-3, respectively). **Right**, UV spectra of peaks 1-3 shown in the chromatograms on the left.

**Figure S3. Alignment of maize *HYD3* in 51 lines.** Variant 5' region was amplified by PCR primers P1/P2 (Fig. 7). Allele and corresponding inbred are denoted on left of each sequence. Colors are as in Fig 6. ①

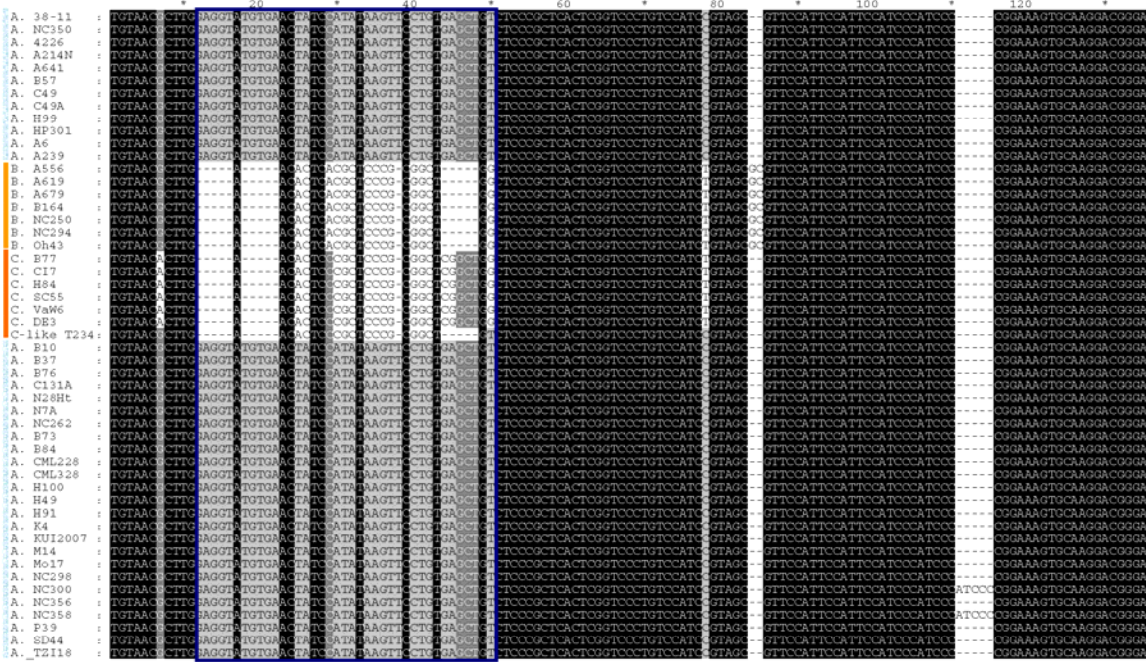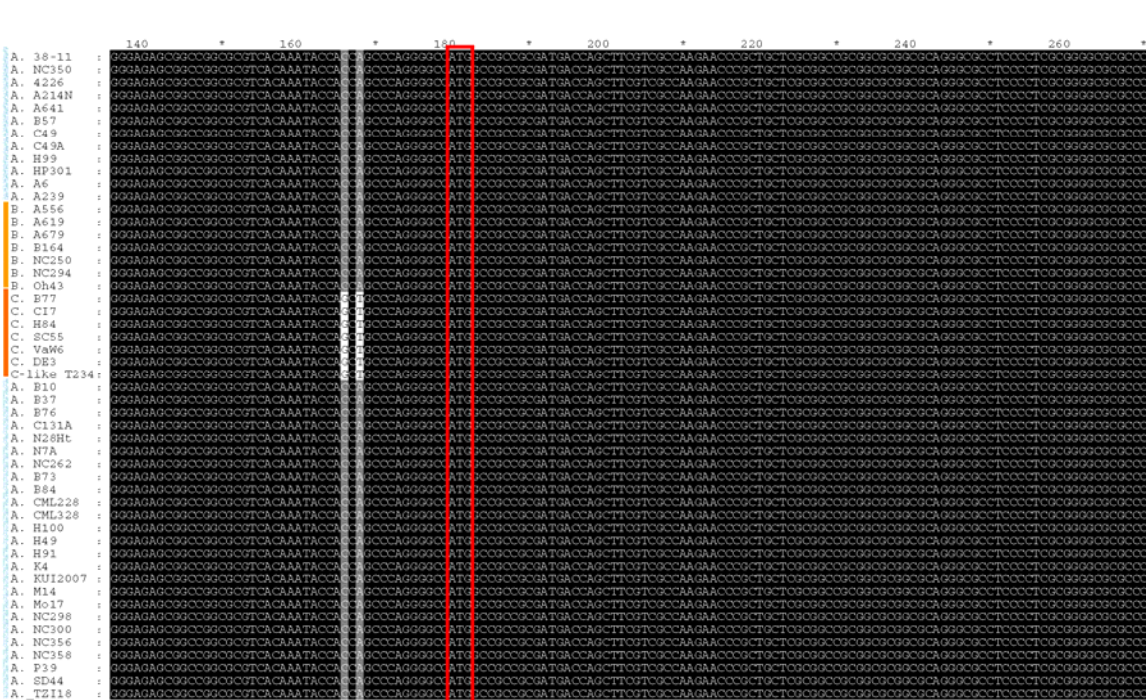

Supplement: pp.109.145177_1.pdf [file pp.109.145177_1.pdf]
