# Supplementary material
Source: PubMed Central journal article supplement (PMC2773064)
Supplement: pp.109.145177_2.pdf [file pp.109.145177_2.pdf]

**Table S1. Primer and gene accession numbers**

| Maize Gene | Primer No | Sequence                 | ACCESSION NO. |                                                 |                                                  |                                       |                                    |
|------------|-----------|--------------------------|---------------|-------------------------------------------------|--------------------------------------------------|---------------------------------------|------------------------------------|
|            |           |                          | Maize         |                                                 |                                                  | Rice                                  | Sorghum                            |
|            |           |                          | MAP           | GENOMIC                                         | cDNA                                             |                                       |                                    |
| HYD3       | 1409      | TGGCCTGGACGAGCTTGTTAG    | 10.05         | AZM5_1855 <sup>a</sup><br>AY844957 <sup>e</sup> | BM382572 <sup>e</sup> /<br>AY844958 <sup>e</sup> | NA                                    | NA                                 |
|            | 995       | CACACTCATTGGCCCACTCGC    |               |                                                 |                                                  |                                       |                                    |
| HYD4       | 1408      | TGGCCTGGACGAGCTGGAAAA    | 2.03          | AZM5_1857 <sup>a</sup>                          | BG320875 <sup>e</sup> /<br>AY844956 <sup>e</sup> | LOC_Os04g48880 <sup>c</sup><br>(HYD1) | Sbi_0.9426 <sup>d</sup><br>(HYD1)  |
|            | 1011      | GGCTCGCGCATCCAAACC       |               |                                                 |                                                  |                                       |                                    |
| HYD5       | 1513      | GCAGCCCATCAGATACATCA     | 9.07          | AZM5_23363 <sup>a</sup>                         | DR817188 <sup>e</sup>                            | LOC_Os03g03370 <sup>c</sup><br>(HYD2) | NA                                 |
|            | 1514      | GCAAGCAGGTCTTATTGGGT     |               |                                                 |                                                  |                                       |                                    |
| HYD6       | 1419      | GAGATCAAGAAGAGGATCAGGAG  | 1.01          | AZM5_7254 <sup>a</sup>                          | BQ619575 <sup>e</sup>                            | LOC_Os10g38940 <sup>c</sup><br>(HYD3) | Sbi_0.29550 <sup>d</sup><br>(HYD2) |
|            | 1420      | GATCTAATGTGAGGAGAAGGTCAA |               |                                                 |                                                  |                                       |                                    |
| CYP97A     | 1344      | CTGGAGCCATCTGAAAGTCA     | 5             | ZmGSStuc11-<br>12-04.50592.1 <sup>b</sup>       | DV169913 <sup>e</sup>                            | LOC_Os02g57290 <sup>c</sup>           | Sbi_0.9326 <sup>d</sup>            |
|            | 1345      | GGACCAAATCCAAACGAGAT     |               |                                                 |                                                  |                                       |                                    |
| CYP97C     | 1348      | GTTGACATTGGATGTGATTGG    | 3.05          | NA                                              | BE552887 <sup>e</sup>                            | LOC_Os10g39930 <sup>c</sup>           | Sbi_0.11094 <sup>d</sup>           |
|            | 1349      | AACCAACCTTCCAGTATGGC     |               |                                                 |                                                  |                                       |                                    |

<sup>a</sup> tigr.org; <sup>b</sup> plantgdb.org; <sup>c</sup> gramene.org; <sup>d</sup> phytozome.org; <sup>e</sup> NCBI

**Table S2. Predicted structural characteristics of HYD proteins.**

| Gene | Accession #                                     |                                                  | Map Position | Transit peptide |           | Mature peptide |           | Isoelectric point (pI) |              | # Transmembrane domains (residues)    |
|------|-------------------------------------------------|--------------------------------------------------|--------------|-----------------|-----------|----------------|-----------|------------------------|--------------|---------------------------------------|
|      | Genomic                                         | cDNA                                             |              | Residues        | Mass (kD) | Residues       | Mass (kD) | Mature protein         | Un-processed |                                       |
| HYD3 | AZM5_1855 <sup>a</sup><br>AY844957 <sup>b</sup> | BM382572 <sup>b</sup> /<br>AY844958 <sup>b</sup> | 10.05        | 69              | 7.1       | 250            | 27.5      | 6.32                   | 8.81         | 4 (22-41; 53-73;<br>107-124; 129-151) |
| HYD4 | AZM5_1857 <sup>a</sup>                          | BG320875 <sup>b</sup> /<br>AY844956 <sup>b</sup> | 2.03         | 68              | 7.0       | 241            | 26.5      | 9.51                   | 9.99         | 4 (42-61; 73-94;<br>127-144; 149-171) |
| HYD5 | AZM5_23363 <sup>a</sup>                         | DR817188 <sup>b</sup>                            | 9.07         | 73              | 7.1       | 220            | 24.5      | 8.11                   | 10.28        | 4 (12-31; 44-64;<br>99-116; 121-143)  |
| HYD6 | AZM5_7254 <sup>a</sup>                          | BQ619575 <sup>b</sup>                            | 1.01         | 56              | 5.8       | 243            | 26.6      | 9.62                   | 9.88         | 4 (36-55; 67-83;<br>122-139; 144-166) |

<sup>a</sup> tigr.org; <sup>b</sup> NCBI

**Table S3. Transcript profiling of *HYD* genes in maize diversity lines and Pearson correlation values. A. Transcript profiling of *HYD3* in maize diversity lines. B-F. Transcript profiling of other hydroxylase genes in maize diversity lines that did not exhibit correlation between transcripts and betacarotene level. Transcripts were measured quantitatively from endosperm collected at the indicated DAP. Parentheses show SD, standard deviation. The fold reduction in transcripts (15/25 DAP) was calculated by dividing the 15 DAP value by the 25 DAP value. Quantitative RT-PCR was performed using gene specific primers (Table S1) and normalized to actin, as previously described (Li et al., 2008a). Values are expressed as the mean of three RT-PCR replicates +/- standard deviation.  $\beta$ -carotene levels in mature kernels are from published values (Harjes et al., 2008). G. Pearson correlation values for all *HYD* transcripts compared to betacarotene levels.**

**Table S3A. Transcript profiling of *HYD3* in maize diversity lines.**

| Inbred         | $\beta$ -carotene<br>$\mu\text{g/g}$ | Relative transcript levels of <i>HYD3</i> (SD) |               |               | Fold reduction<br>15/25 DAP |
|----------------|--------------------------------------|------------------------------------------------|---------------|---------------|-----------------------------|
|                |                                      | 15 DAP                                         | 20 DAP        | 25 DAP        |                             |
| <b>A619</b>    | 6.11                                 | 408.4 (14.01)                                  | 0.23 (0.13)   | 0.08 (0.02)   | 5105                        |
| <b>B73</b>     | 0.57                                 | 163.96 (19.04)                                 | 135.97 (49)   | 90.23 (5.07)  | 1.8                         |
| <b>B37</b>     | 1.15                                 | 482.32 (111.6)                                 | 246.51(67.39) | 100.46 (8.07) | 4.8                         |
| <b>CI.7</b>    | 13.63                                | 515.15 (98.79)                                 | 26.40 (4.87)  | 0.12 (0.01)   | 4293                        |
| <b>CI31A</b>   | 0.82                                 | 791.72 (73.78)                                 | 164.71 (30.5) | 88.47 (14.8)  | 9.0                         |
| <b>DE3</b>     | 13.34                                | 147.93 (14.36)                                 | 2.70 (0.48)   | 0.05 (0)      | 2959                        |
| <b>KUI2007</b> | 3.15                                 | 240.32 (13.9)                                  | 317.84 (47.2) | 352.26 (64.5) | 0.7                         |
| <b>NC300</b>   | 1.90                                 | 363 (21.3)                                     | 164.52 (62.5) | 99.53 (21.31) | 3.7                         |
| <b>SD44</b>    | 1.95                                 | 350.64 (65.4)                                  | 5.79 (1.76)   | 4.45 (0.19)   | 64.9                        |
| <b>TZI18</b>   | 2.36                                 | 375.8 (7.36 )                                  | 159.10 (8.2)  | 130.43 (15.4) | 2.9                         |

**Table S3B-F. Transcript profiling of other hydroxylase genes in maize diversity lines that did not exhibit correlation between transcripts and betacarotene level.**

**B**

| Inbred  | $\beta$ -carotene | Relative transcript levels of <i>HYD4</i> (SD) |             |             | Fold reduction |
|---------|-------------------|------------------------------------------------|-------------|-------------|----------------|
|         | $\mu\text{g/g}$   | 15 DAP                                         | 20 DAP      | 25 DAP      | 15/25 DAP      |
| A619    | 6.11              | 1.43 (0.08)                                    | 3.32 (0.17) | 2.5 (0.10)  | 0.57           |
| B73     | 0.57              | 1.83 (0.34)                                    | 2.3 (0.51)  | 2.8 (0.46)  | 0.65           |
| B37     | 1.15              | 4.12 (0.63)                                    | 9.67 (0.49) | 8.11 (0.69) | 0.51           |
| CI.7    | 13.63             | 3.66 (0.83)                                    | 3.74 (0.40) | 2.73 (0.19) | 1.34           |
| CI31A   | 0.82              | 2.37 (1.15)                                    | 1.23 (0.37) | 1.71 (0.13) | 1.39           |
| DE3     | 13.34             | 2.4 (0.47)                                     | 3.54 (0.76) | 1.81 (0.12) | 1.32           |
| KUI2007 | 3.15              | 1.04 (0.31)                                    | 6.69 (1.12) | 8.98 (2.15) | 0.12           |
| NC300   | 1.90              | 1.3 (0.52)                                     | 1.5 (0.22)  | 2.02 (0.10) | 0.64           |
| SD44    | 1.95              | 1.73 (0.62)                                    | 5.61 (0.19) | 4.69 (1.90) | 0.37           |
| TZI18   | 2.36              | 1.18 (0.82)                                    | 3.5 (0.29)  | 3.46 (0.34) | 0.34           |

**C**

| Inbred  | $\beta$ -carotene | Relative transcript levels of <i>HYD5</i> (SD) |             |             | Fold reduction |
|---------|-------------------|------------------------------------------------|-------------|-------------|----------------|
|         | $\mu\text{g/g}$   | 15 DAP                                         | 20 DAP      | 25 DAP      | 15/25 DAP      |
| A619    | 6.11              | 0.03 (0.01)                                    | 0.02 (0.00) | 0.01 (0.00) | 2.93           |
| B73     | 0.57              | 0.01 (0.00)                                    | 0.05 (0.02) | 0.05 (0.02) | 0.19           |
| B37     | 1.15              | 0.06 (0.04)                                    | 0.15 (0.02) | 0.01 (0.01) | 6.47           |
| CI.7    | 13.63             | 0.05 (0.00)                                    | 0.06 (0.00) | 0.02 (0.02) | 2.09           |
| CI31A   | 0.82              | 0.03 (0.01)                                    | 0.01 (0.00) | 0.01 (0.01) | 2.64           |
| DE3     | 13.34             | 0.01 (0.01)                                    | 0.01 (0.00) | 0.01 (0.01) | 1.08           |
| KUI2007 | 3.15              | 0.02 (0.01)                                    | 0.03 (0.00) | 0.05 (0.01) | 0.35           |
| NC300   | 1.90              | 0.01 (0.00)                                    | 0.01 (0.00) | 0.02 (0.01) | 0.6            |
| SD44    | 1.95              | 0.21 (0.08)                                    | 0.05 (0.04) | 0.09 (0.01) | 2.23           |
| TZI18   | 2.36              | 0.11 (0.04)                                    | 0.03 (0.00) | 0.03 (0.01) | 3.18           |

**D**

| Inbred  | $\beta$ -carotene | Relative transcript levels of <i>HYD6</i> (SD) |             |             | Fold reduction |
|---------|-------------------|------------------------------------------------|-------------|-------------|----------------|
|         | $\mu\text{g/g}$   | 15 DAP                                         | 20 DAP      | 25 DAP      | 15/25 DAP      |
| A619    | 6.11              | 0.01 (0.00)                                    | 0.02 (0.01) | 0.01 (0.00) | 0.71           |
| B73     | 0.57              | 0.08 (0.00)                                    | 0.33 (0.01) | 0.19 (0.02) | 0.43           |
| B37     | 1.15              | 0.07 (0.01)                                    | 0.26 (0.02) | 0.11 (0.03) | 0.66           |
| CI.7    | 13.63             | 0.02 (0.01)                                    | 0.09 (0.03) | 0.08 (0.06) | 0.23           |
| CI31A   | 0.82              | 0.05 (0.02)                                    | 0.03 (0.01) | 0.14 (0.02) | 0.35           |
| DE3     | 13.34             | 0.01 (0.00)                                    | 0.21 (0.02) | 0.01 (0.00) | 0.7            |
| KUI2007 | 3.15              | 0.01 (0.00)                                    | 0.11 (0.00) | 0.71 (0.17) | 0.01           |
| NC300   | 1.90              | 0.01 (0.00)                                    | 0.01 (0.00) | 0.02 (0.01) | 0.61           |
| SD44    | 1.95              | 0.01 (0.00)                                    | 0.23 (0.05) | 0.23 (0.04) | 0.03           |
| TZI18   | 2.36              | 0.08 (0.05)                                    | 0.17 (0.02) | 0.02 (0.00) | 4.78           |

E

| Inbred  | $\beta$ -carotene | Relative transcript levels of CYP97A (SD) |             |             | Fold reduction |
|---------|-------------------|-------------------------------------------|-------------|-------------|----------------|
|         | $\mu\text{g/g}$   | 15 DAP                                    | 20 DAP      | 25 DAP      | 15/25 DAP      |
| A619    | 6.11              | 0.12 (0.03)                               | 1.97 (0.43) | 0.8 (0.21)  | 0.15           |
| B73     | 0.57              | 0.21(0.03)                                | 0.11 (0.00) | 0.14 (0.01) | 1.5            |
| B37     | 1.15              | 0.04 (0.01)                               | 0.9 (0.12)  | 0.39 (0.12) | 0.1            |
| CI.7    | 13.63             | 0.04 (0.01)                               | 1.05 (0.02) | 0.09 (0.01) | 0.44           |
| CI31A   | 0.82              | 0.13 (0.07)                               | 0.71(0.11)  | 0.22 (0.07) | 0.59           |
| DE3     | 13.34             | 0.08 (0.00)                               | 0.57 (0.11) | 0.1 (0.03)  | 0.8            |
| KUI2007 | 3.15              | 0.34 (0.02)                               | 2.42 (0.31) | 0.38 (0.02) | 0.89           |
| NC300   | 1.90              | 0.07 (0.01)                               | 0.7(0.14)   | 0.27 (0.07) | 0.26           |
| SD44    | 1.95              | 0.04 (0.02)                               | 0.53 (0.21) | 0.22 (0.02) | 0.18           |
| TZI18   | 2.36              | 0.43 (0.01)                               | 2.37 (0.21) | 0.65 (0.12) | 0.65           |

F

| Inbred  | $\beta$ -carotene | Relative transcript levels of CYP97C (SD) |             |             | Fold reduction |
|---------|-------------------|-------------------------------------------|-------------|-------------|----------------|
|         | $\mu\text{g/g}$   | 15 DAP                                    | 20 DAP      | 25 DAP      | 15/25 DAP      |
| A619    | 6.11              | 0.32 (0.00)                               | 4.06 (0.92) | 1.2 (0.17)  | 0.27           |
| B73     | 0.57              | 0.51 (0.02)                               | 0.68 (0.14) | 0.33 (0.13) | 1.55           |
| B37     | 1.15              | 0.13 (0.09)                               | 3.3 (0.03)  | 1.76 (0.51) | 0.07           |
| CI.7    | 13.63             | 0.42 (0.02)                               | 5.33 (0.80) | 0.73 (0.46) | 0.58           |
| CI31A   | 0.82              | 0.27 (0.16)                               | 4.17 (0.13) | 1.57 (0.21) | 0.17           |
| DE3     | 13.34             | 0.44 (0.00)                               | 2.3 (0.35)  | 1.25 (0.26) | 0.35           |
| KUI2007 | 3.15              | 0.15 (0.02)                               | 1.22 (0.23) | 3.1 (0.28)  | 0.05           |
| NC300   | 1.90              | 0.1 (0.00)                                | 1.86 (0.10) | 0.62 (0.13) | 0.16           |
| SD44    | 1.95              | 0.41 (0.11)                               | 4.2 (0.35)  | 1.61 (0.11) | 0.14           |
| TZI18   | 2.36              | 0.4 (0.03)                                | 2.41 (0.48) | 1.73 (0.17) | 0.23           |

**Table S3G. Pearson correlation values for all HYD transcripts compared to betacarotene levels.**

| <b>HYD gene</b> | <b>DAP</b> | <b><math>\beta</math>-carotene</b> |
|-----------------|------------|------------------------------------|
| <b>HYD3</b>     | 15         | -0.17 (0.63 )                      |
|                 | 20         | -0.58 (0.07)                       |
|                 | 25         | -0.42 (0.21 )                      |
|                 | 15/25      | <b>0.79 (0.005)</b>                |
| <b>HYD4</b>     | 15         | 0.35 (0.30)                        |
|                 | 20         | -0.08 (0.81)                       |
|                 | 25         | -0.30 (0.38)                       |
|                 | 15/25      | 0.60 (0.06)                        |
| <b>HYD5</b>     | 15         | -0.20 (0.56)                       |
|                 | 20         | -0.171 (0.63)                      |
|                 | 25         | -0.33 (0.34)                       |
|                 | 15/25      | -0.15 (0.66)                       |
| <b>HYD6</b>     | 15         | -0.48 (0.15 )                      |
|                 | 20         | -0.13 (0.70 )                      |
|                 | 25         | -0.25 (0.47)                       |
|                 | 15/25      | -0.12(0.73)                        |
| <b>CYP97A</b>   | 15         | -0.29 (0.40 )                      |
|                 | 20         | 0.006 (0.98)                       |
|                 | 25         | -0.27 (0.44)                       |
|                 | 15/25      | -0.02 (0.93)                       |
| <b>CYP97C</b>   | 15         | 0.37 (0.28 )                       |
|                 | 20         | 0.36 (0.30)                        |
|                 | 25         | -0.19 (0.58 )                      |
|                 | 15/25      | 0.02 (0.94)                        |
